# Supplementary material for: Therapeutic effects of extracorporeal shock wave therapy on patients with spastic cerebral palsy and Rett syndrome: clinical and ultrasonographic findings
Source: Orphanet J Rare Dis. 2024 Jan 3;19:6. doi: 10.1186/s13023-023-03010-y (PMC10763338; doi:10.1186/s13023-023-03010-y)
Supplement: Supplementary file 2 — Additional file 2. Table S2. The raw data of AFRI and MAS score of all study subjects [file 13023_2023_3010_MOESM2_ESM.xlsx]

## Sheet: ARFI
No.	Group	Age(yrds)	Gender	Measurement	R-GCM-M	R-SOL	R-GCM-L	L-GCM-M	L-SOL	L-GCM-L	GCM-M	SOL	GCM-L
1	CP	9	F	1 (Baseline)	2.37	2.68	2.23	3.12	2.14	2.11	2.745	2.41	2.17
				2 (4 weeks)	2.74	3.28	2.7	2.7	1.63	2.62	2.72	2.455	2.66
				3 (12 weeks)	2.1	2.25	1.96	2.39	1.9	2.04	2.245	2.075	2
2	CP	5	M	1 (Baseline)	3.13	1.84	2.5	1.59	1.61	1.92	2.36	1.725	2.21
				2 (4 weeks)	1.57	1.14	1.61	1.56	1.76	1.22	1.565	1.45	1.415
				3 (12 weeks)	2.16	1.48	2.6	2.02	2.18	1.44	2.09	1.83	2.02
3	CP	3	M	1 (Baseline)	2.83	2.74	1.99	3.38	1.81	2.48	3.105	2.275	2.235
				2 (4 weeks)	2.67	1.98	2.26	2.5	2	2.22	2.585	1.99	2.24
				3 (12 weeks)	2.81	1.89	1.64	2.5	2.26	1.72	2.655	2.075	1.68
4	CP	4	F	1 (Baseline)	3.52	2.33	2.69	3.36	3.24	3.27	3.44	2.785	2.98
				2 (4 weeks)	3.16	1.53	2.83	3.57	2.71	3.52	3.365	2.12	3.175
				3 (12 weeks)	2.69	2.05	2.92	3.35	2.23	2.76	3.02	2.14	2.84
5	CP	8	M	1 (Baseline)	2.14	2.46	1.71	2.11	2.44	2.16	2.125	2.45	1.935
				2 (4 weeks)	2.7	3.42	1.87	2.12	1.68	2.02	2.41	2.55	1.945
				3 (12 weeks)	2.44	3.29	1.96	1.7	1.96	2.07	2.07	2.625	2.015
6	CP	5	F	1 (Baseline)	2.7	1.3	2.39	2.86	2.2	2.52	2.78	1.75	2.455
				2 (4 weeks)	2.6	1.53	2.27	2.47	1.67	2.21	2.535	1.6	2.24
				3 (12 weeks)	2.35	1.47	2.21	2.45	1.41	2.74	2.4	1.44	2.475
7	CP	4	F	1 (Baseline)	2.8	1.57	2.5	3.3	2.26	2.63	3.05	1.915	2.565
				2 (4 weeks)	2.7	1.53	2.62	2.69	1.6	2.58	2.695	1.565	2.6
				3 (12 weeks)	1.61	1.68	1.72	1.95	1.76	2.32	1.78	1.72	2.02
8	CP	3	F	1 (Baseline)	2.57	2.09	2.46	2.56	1.88	2.95	2.565	1.985	2.705
				2 (4 weeks)	3.02	1.64	1.69	2.3	1.62	2.29	2.66	1.63	1.99
				3 (12 weeks)	2.3	1.87	2.3	2.59	1.73	2.65	2.445	1.8	2.475
9	CP	3	M	1 (Baseline)	2.27	2.41	1.94	2.52	1.59	2.06	2.395	2	2
				2 (4 weeks)	2.48	2.31	2.83	2.41	2.28	3.47	2.445	2.295	3.15
				3 (12 weeks)	2.36	2.29	3.07	3.5	2.7	3.27	2.93	2.495	3.17
10	CP	6	M	1 (Baseline)	3.4	1.56	2.59	2.99	1.52	2.66	3.195	1.54	2.625
				2 (4 weeks)	2.77	1.42	2.21	2.26	1.49	2	2.515	1.455	2.105
				3 (12 weeks)	2.62	1.15	2.03	2.12	1.43	1.81	2.37	1.29	1.92
11	CP	7	M	1 (Baseline)	2.79	1.8	2.45	2.31	1.36	2.03	2.55	1.58	2.24
				2 (4 weeks)	2.45	1.32	1.91	2.95	1.52	2.22	2.7	1.42	2.065
				3 (12 weeks)	2.71	1.21	2.68	2.89	1.9	2.54	2.8	1.555	2.61
12	CP	7	F	1 (Baseline)	2.16	1.31	1.93	2.44	1.83	2.77	2.3	1.57	2.35
				2 (4 weeks)	1.98	1.5	2.31	2.59	1.75	2.45	2.285	1.625	2.38
				3 (12 weeks)	2.65	2.05	2.03	2.75	1.86	2.4	2.7	1.955	2.215
13	CP	21	F	1 (Baseline)	1.68	2.33	1.61	2.52	1.58	2.87	2.1	1.955	2.24
				2 (4 weeks)	1.53	1.95	1.64	1.4	1.62	1.36	1.465	1.785	1.5
				3 (12 weeks)	2.41	1.26	1.55	1.28	2.07	1.96	1.845	1.665	1.755
14	CP	20	F	1 (Baseline)	1.02	0.84	0.67	2.02	1.66	1.86	1.52	1.25	1.265
				2 (4 weeks)	1.16	1.99	1.26	1.62	1.49	1.61	1.39	1.74	1.435
				3 (12 weeks)	1.52	2.01	1.68	1.39	1.61	1.84	1.455	1.81	1.76
15	CP	15	F	1 (Baseline)	2.84	2.92	2.29	2.52	2.69	2.5	2.68	2.805	2.395
				2 (4 weeks)	2.66	1.6	2.13	2.59	3.24	2.48	2.625	2.42	2.305
				3 (12 weeks)	2.6	1.55	2.03	2.36	1.68	2.2	2.48	1.615	2.115
1	RETT	18	M	1 (Baseline)	0.93	2.18	0.85	0.7	1.09	0.75	0.815	1.635	0.8
				2 (4 weeks)	1.75	2.19	2.05	2.07	1.72	1.79	1.91	1.955	1.92
				3 (12 weeks)	2.43	2.49	2.03	2.02	1.93	1.66	2.225	2.21	1.845
2	RETT	19	M	1 (Baseline)	1.06	0.99	1.03	0.8	0.87	0.64	0.93	0.93	0.835
				2 (4 weeks)	0.67	1.08	2.09	3.03	2.12	2.7	1.85	1.6	2.395
				3 (12 weeks)	2.54	1.52	2	2.51	2.42	2.02	2.525	1.97	2.01
3	RETT	17	M	1 (Baseline)	1.24	1.08	2.55	1.42	0.72	0.72	1.33	0.9	1.635
				2 (4 weeks)	2.36	2.43	2.17	2.37	2.14	1.82	2.365	2.285	1.995
				3 (12 weeks)	1.85	1.95	1.98	2.27	2.2	1.92	2.06	2.075	1.95
4	RETT	6	M	1 (Baseline)	1.94	1.39	1.8	2	1.49	1.81	1.97	1.44	1.805
				2 (4 weeks)	1.08	0.85	0.91	0.74	0.99	0.93	0.91	0.92	0.92
				3 (12 weeks)	2.53	1.82	1.99	2.3	1.78	2.23	2.415	1.8	2.11
5	RETT	22	M	1 (Baseline)	2.67	1.35	2.01	3.21	2.28	2.69	2.94	1.815	2.35
				2 (4 weeks)	2.52	1.55	2.11	2.49	2.39	2.39	2.505	1.97	2.25
				3 (12 weeks)	2.92	2.23	2.84	3.19	2.37	2.45	3.055	2.3	2.645
6	RETT	5	M	1 (Baseline)	0.85	0.62	1.39	0.75	0.85	1.71	0.8	0.735	1.55
				2 (4 weeks)	1.93	1.55	1.7	2.53	1.54	2.5	2.23	1.545	2.1
				3 (12 weeks)	2.41	1.45	2.01	2.11	1.43	2.2	2.26	1.44	2.105

## Sheet: MAS
No.	Group	Age(yrds)	Gender	Measurement	R't	L't	Mean
1	CP	9	F	1 (Baseline)	0	2	1
				2 (4 weeks)	1	2	1.5
				3 (12 weeks)	1	2	1.5
2	CP	5	M	1 (Baseline)	3	3	3
				2 (4 weeks)	1	1	1
				3 (12 weeks)	0	1	0.5
3	CP	3	M	1 (Baseline)	1	3	2
				2 (4 weeks)	1	1	1
				3 (12 weeks)	1	1	1
4	CP	4	F	1 (Baseline)	2	3	2.5
				2 (4 weeks)	2	2	2
				3 (12 weeks)	1	1	1
5	CP	8	M	1 (Baseline)	1	0	0.5
				2 (4 weeks)	0	0	0
				3 (12 weeks)	1	0	0.5
6	CP	5	F	1 (Baseline)	3	3	3
				2 (4 weeks)	4	4	4
				3 (12 weeks)	4	4	4
7	CP	4	F	1 (Baseline)	3	3	3
				2 (4 weeks)	1	3	2
				3 (12 weeks)	1	2	1.5
8	CP	3	F	1 (Baseline)	4	4	4
				2 (4 weeks)	3	3	3
				3 (12 weeks)	3	2	2.5
9	CP	3	M	1 (Baseline)	3	3	3
				2 (4 weeks)	3	3	3
				3 (12 weeks)	3	3	3
10	CP	6	M	1 (Baseline)	3	1	2
				2 (4 weeks)	1	1	1
				3 (12 weeks)	1	1	1
11	CP	7	M	1 (Baseline)	1	0	0.5
				2 (4 weeks)	1	0	0.5
				3 (12 weeks)	1	0	0.5
12	CP	7	F	1 (Baseline)	2	2	2
				2 (4 weeks)	2	1	1.5
				3 (12 weeks)	1	1	1
13	CP	21	F	1 (Baseline)	4	4	4
				2 (4 weeks)	3	3	3
				3 (12 weeks)	3	3	3
14	CP	20	F	1 (Baseline)	1	2	1.5
				2 (4 weeks)	1	1	1
				3 (12 weeks)	0	1	0.5
15	CP	15	F	1 (Baseline)	1	1	1
				2 (4 weeks)	0	0	0
				3 (12 weeks)	1	1	1
1	RETT	18	M	1 (Baseline)	4	4	4
				2 (4 weeks)	4	4	4
				3 (12 weeks)	4	4	4
2	RETT	19	M	1 (Baseline)	5	5	5
				2 (4 weeks)	5	5	5
				3 (12 weeks)	5	5	5
3	RETT	17	M	1 (Baseline)	3	3	3
				2 (4 weeks)	2	2	2
				3 (12 weeks)	2	2	2
4	RETT	6	M	1 (Baseline)	4	4	4
				2 (4 weeks)	3	3	3
				3 (12 weeks)	3	3	3
5	RETT	22	M	1 (Baseline)	4	4	4
				2 (4 weeks)	4	4	4
				3 (12 weeks)	4	4	4
6	RETT	5	M	1 (Baseline)	4	4	4
				2 (4 weeks)	3	3	3
				3 (12 weeks)	2	2	2
